# Supplementary material
Source: publisher site journal article supplement (https://www.dovepress.com/article/365348)
Supplement: Supplementary file 1 [file get_supplementary_file.php]

**Supplementary Materials**

**Table S1** Medications that affect surgery and approximate duration of discontinuation before surgery, examinations, and biopsies

| Effect | Medications | Approximate duration of discontinuation before surgery, examinations, and biopsies (days) |
| --- | --- | --- |
| Antiplatelet | Aspirin | 7–10 |
| Clopidogrel sulfate | 10–14 |
| Prasugrel hydrochloride | ≥14 |
| Ticlopidine hydrochloride | 10–14 |
| Ticagrelor | ≥5 |
| Cilostazol | 2 |
| Ethyl icosapentate | 7–10 |
| Beraprost | 1–4 |
| Sarpogrelate hydrochloride | 1 |
| Limaprost alfadex | 1 |
| Anticoagulant | Warfarin　potassium | 5–7 |
| Heparin sodium | Neutralize with protamine sulfate |
| Heparin calcium |
| Dalteparin sodium |
| Inhibit coagulation factor X activity | Rivaroxaban | ≥1 |
| Apixaban | 1–2 |
| Edoxaban tosilate hydrate | ≥1 |
| Inhibit thrombin formation | Dabigatran etexilate methanesulfonate | 1–2 |
| Argatroban hydrate | 0.25 (6 h) |
| Improve cerebral blood circulation | Ibudilast | 3 |
| Nicergoline | 2 |
| Ifenprodil tartrate | 2 |
| Improve coronary blood flow | Dipyridamole | 1–2 |
| Dilazep hydrochloride hydrate | 2 |
| Trapidil | 2 |

**Notes:** The approximate duration of medication discontinuation is according to a Kitasato University Hospital guideline. The duration of medication discontinuation was determined by the doctor considering the patient's general condition and degree of invasion and bleeding caused by surgery, examinations, and biopsies.

**Table S2** Multivariate logistic regression analysis of risk factors for medication non-adherence that affect surgery without controlling for the effect of sex (n=887)

| Risk factor | Odds ratio (95% CI) | p-value |
| --- | --- | --- |
| Age |  |  |
| <65 years | 1 (ref) |  |
| ≥65 years | 2.14 (1.11–4.12) | 0.023 |
| Presence of dementia |  |  |
| No | 1 (ref) |  |
| Yes | 2.56 (0.80–8.13) | 0.11 |
| Presence of roommate |  |  |
| No | 1 (ref) |  |
| Yes | 0.80 (0.49–1.33) | 0.39 |
| Medications |  |  |
| One | 1 (ref) |  |
| Two | 1.04 (0.61–1.78) | 0.89 |
| Three or more | 1.33 (0.45–3.96) | 0.61 |
| Days until surgery |  |  |
| <30 | 1 (ref) |  |
| ≥30 | 1.12 (0.61–2.05) | 0.72 |

**Abbreviations:** CI, confidence interval; ref, reference
